# Supplementary material for: Inhibition of EIF2α Dephosphorylation Decreases Cell Viability and Synergizes with Standard-of-Care Chemotherapeutics in Head and Neck Squamous Cell Carcinoma
Source: MDPI journal article supplement (doi:10.3390/cancers15225350), 2023-11-09
Supplement: s1 [file s1]

**Supplementary Table S1.** Antibodies used in the study.

| Primary antibody              |            | Manufacturer (Cat. No)                                                                              | Dilution                    | Species of origin |
|-------------------------------|------------|-----------------------------------------------------------------------------------------------------|-----------------------------|-------------------|
| eIF2 $\alpha$                 | monoclonal | Cell Signaling (#5324)                                                                              | 1:1000 (WB)<br>1:2000 (IHC) | Rabbit            |
| phospho-eIF2 $\alpha$ (Ser51) | monoclonal | Cell Signaling (#3398)                                                                              | 1:1000 (WB)                 | Rabbit            |
| GAPDH (14C10)                 | monoclonal | Cell Signaling (#2118)                                                                              | 1:3000                      | Rabbit            |
| HPV16/18                      | monoclonal | Exalpha Biologicals (HP305)<br>Secondary reagents: BIOLOGO Universal Staining System DAB (# DA005)  | Ready - use (IHC)           | Mouse             |
| p16                           | monoclonal | Exalpha Biologicals (P16002)<br>Secondary reagents: BIOLOGO Universal Staining System DAB (# DA005) | 1:10 (IHC)                  | Mouse             |
| $\alpha$ -Tubulin             | monoclonal | SantaCruz sc-5286                                                                                   | 1:1000                      | Mouse             |
| Cyclin A                      | monoclonal | SantaCruz sc-271682                                                                                 | 1:500                       | Mouse             |
| Cyclin D1                     | monoclonal | SantaCruz sc-8396                                                                                   | 1:500                       | Mouse             |
| CDK2                          | monoclonal | SantaCruz sc-6248                                                                                   | 1:500                       | Mouse             |
| E2F1                          | polyclonal | Cell Signaling (##3742)                                                                             | 1:1000                      | Rabbit            |
| p21                           | monoclonal | Cell Signaling (#2947)                                                                              | 1:1000                      | Rabbit            |
| Rb1                           | monoclonal | Invitrogen (SY63-03)                                                                                | 1:1000                      | Rabbit            |
| pRb1 (Ser780)                 | polyclonal | Invitrogen (PA5-114632)                                                                             | 1:1000                      | Rabbit            |
| pRb1 (Ser807/811)             | monoclonal | Invitrogen (13H27L9)                                                                                | 1:500                       | Rabbit            |
| Anti-Rabbit                   | HRP-linked | Cell Signaling (#7074)                                                                              | 1:2000                      | Goat              |
| Anti-mouse                    | HRP-linked | Cell Signaling (#7076)                                                                              | 1:2000                      | Horse             |

**Supplementary Figure 1.1.** *EIF2S1* is elevated in HNSCC at all stages and all histological grades in comparison to normal epithelium. In all box-and-whisker diagrams horizontal line within the box corresponds to median, box boundaries to lower and upper quartiles and vertical lines stretch from minimum to maximum values. Statistical analysis was performed by comparing the interquartile range of each group by Welch's t-test, significance level  $p < 0.05$ .

(A)

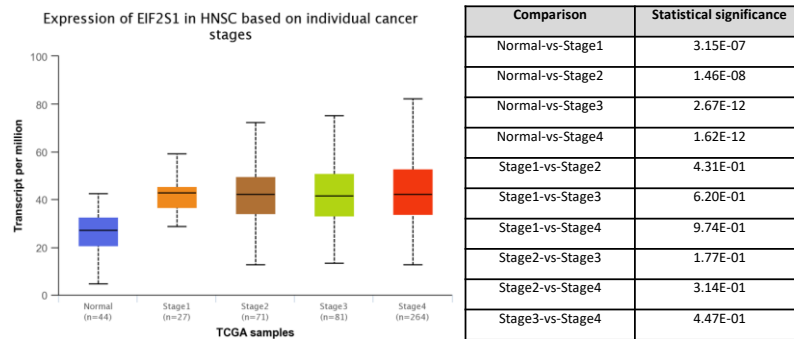

(B)

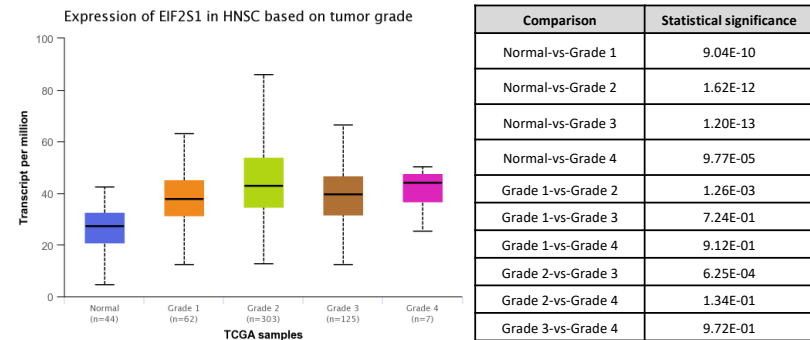

**Supplementary Figure 1.2.** *EIF2S2* and *EIF2S3* genes are overexpressed in head and neck squamous cell carcinoma (HNSCC). (A, B) *EIF2S2* and *EIF2S3* transcript expression are elevated in HNSCC of all stages, the increase becomes more pronounced with cancer progression. (C, D) *EIF2S2* and *EIF2S3* are elevated in HNSCC across all histological grades. The transcript expression increases with increasing cancer grade. In all box-and-whisker diagrams horizontal line within the box corresponds to median, box boundaries to lower and upper quartiles and vertical lines stretch from minimum to maximum values. Statistical analysis was performed by comparing the interquartile range of each group by Welch's t-test, significance level  $p < 0.05$ .

(A)

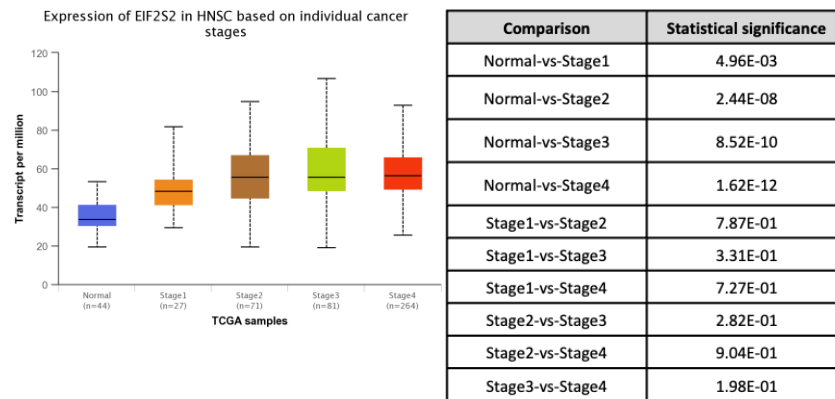

(B)

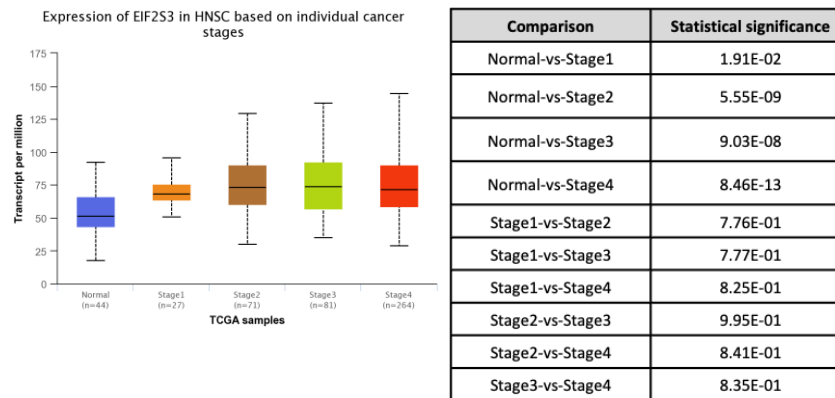

(C)

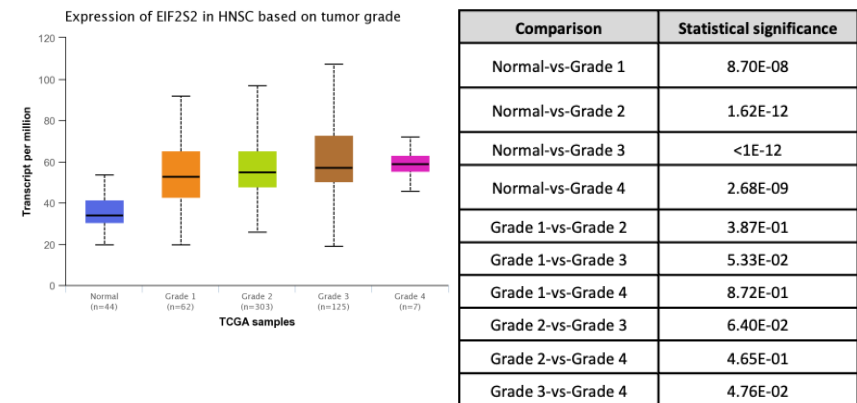

(D)

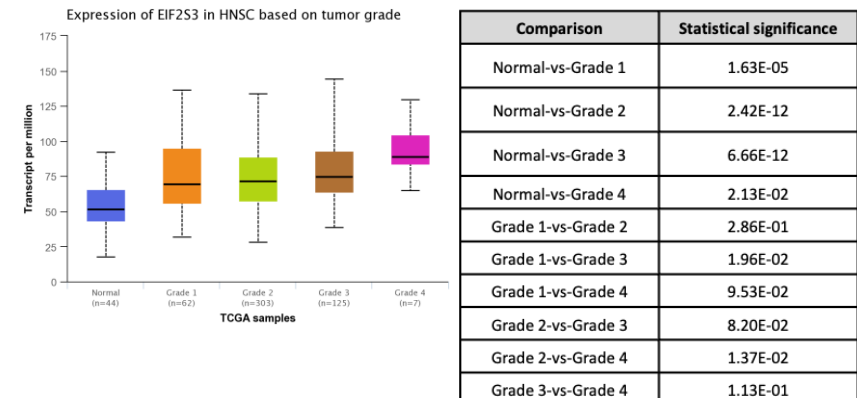

**Supplementary Figure 2.1.** *EIF2B1* and *EIF2B2* genes are overexpressed in head and neck squamous cell carcinoma (HNSCC). (A, B) *EIF2B1* and *EIF2B2* transcript expression is elevated in HNSCC of all stages, the increase becomes more pronounced with cancer progression. (C, D) *EIF2B1* and *EIF2B2* is elevated in HNSCC across all histological grades. *EIF2B1* transcript expression increases with increasing cancer grade, whereas *EIF2B2* is highest in grade 2 tumors. In all box-and-whisker diagrams horizontal line within the box corresponds to median, box boundaries to lower and upper quartiles and vertical continuous lines stretch from minimum to maximum values. Statistical analysis was performed by comparing the interquartile range of each group by Welch's t-test, significance level  $p < 0.05$ .

(A)

Expression of *EIF2B1* in HNSC based on individual cancer stages

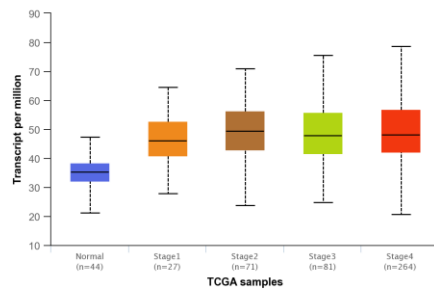

| Comparison       | Statistical significance |
|------------------|--------------------------|
| Normal-vs-Stage1 | 1.70E-05                 |
| Normal-vs-Stage2 | 2.36E-13                 |
| Normal-vs-Stage3 | 1.94E-13                 |
| Normal-vs-Stage4 | 1.62E-12                 |
| Stage1-vs-Stage2 | 5.49E-01                 |
| Stage1-vs-Stage3 | 7.02E-01                 |
| Stage1-vs-Stage4 | 5.22E-01                 |
| Stage2-vs-Stage3 | 7.94E-01                 |
| Stage2-vs-Stage4 | 8.01E-01                 |
| Stage3-vs-Stage4 | 5.91E-01                 |

(C)

Expression of *EIF2B1* in HNSC based on tumor grade

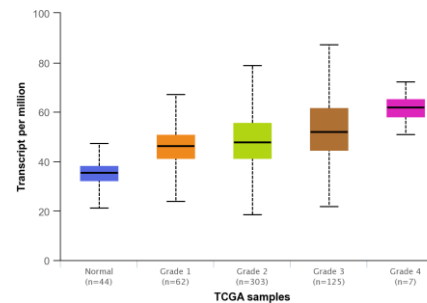

| Comparison         | Statistical significance |
|--------------------|--------------------------|
| Normal-vs-Grade 1  | 4.19E-08                 |
| Normal-vs-Grade 2  | 1.62E-12                 |
| Normal-vs-Grade 3  | <1E-12                   |
| Normal-vs-Grade 4  | 5.28E-11                 |
| Grade 1-vs-Grade 2 | 7.17E-02                 |
| Grade 1-vs-Grade 3 | 7.44E-04                 |
| Grade 1-vs-Grade 4 | 2.66E-03                 |
| Grade 2-vs-Grade 3 | 2.38E-02                 |
| Grade 2-vs-Grade 4 | 3.64E-02                 |
| Grade 3-vs-Grade 4 | 1.14E-01                 |

(B)

Expression of *EIF2B2* in HNSC based on individual cancer stages

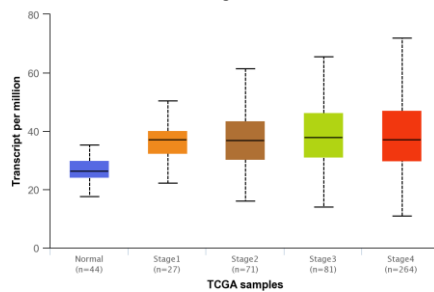

| Comparison       | Statistical significance |
|------------------|--------------------------|
| Normal-vs-Stage1 | 1.79E-05                 |
| Normal-vs-Stage2 | 1.70E-08                 |
| Normal-vs-Stage3 | 1.88E-12                 |
| Normal-vs-Stage4 | 1.62E-12                 |
| Stage1-vs-Stage2 | 5.93E-01                 |
| Stage1-vs-Stage3 | 8.22E-01                 |
| Stage1-vs-Stage4 | 9.75E-01                 |
| Stage2-vs-Stage3 | 6.76E-01                 |
| Stage2-vs-Stage4 | 4.88E-01                 |
| Stage3-vs-Stage4 | 7.44E-01                 |

(D)

Expression of *EIF2B2* in HNSC based on tumor grade

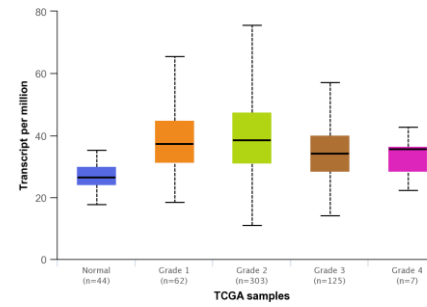

| Comparison         | Statistical significance |
|--------------------|--------------------------|
| Normal-vs-Grade 1  | 9.01E-11                 |
| Normal-vs-Grade 2  | 1.62E-12                 |
| Normal-vs-Grade 3  | 8.87E-12                 |
| Normal-vs-Grade 4  | 9.08E-03                 |
| Grade 1-vs-Grade 2 | 1.86E-01                 |
| Grade 1-vs-Grade 3 | 9.13E-02                 |
| Grade 1-vs-Grade 4 | 1.75E-01                 |
| Grade 2-vs-Grade 3 | 6.34E-05                 |
| Grade 2-vs-Grade 4 | 1.18E-02                 |
| Grade 3-vs-Grade 4 | 4.40E-01                 |

**Supplementary Figure 2.2.** *EIF2B3* gene is overexpressed in head and neck squamous cell carcinoma (HNSCC). **(A and C)** *EIF2B3* transcript expression is elevated in HNSCC of all stages and grades, the increase becomes more pronounced with cancer progression. **(B and D)** *EIF2B4* transcript is unchanged across tumor stages and grades. In all box-and-whisker diagrams horizontal line within the box corresponds to median, box boundaries to lower and upper quartiles and vertical lines stretch from minimum to maximum values. Statistical analysis was performed by comparing the interquartile range of each group by Welch's t-test, significance level  $p < 0.05$ .

**(A)**

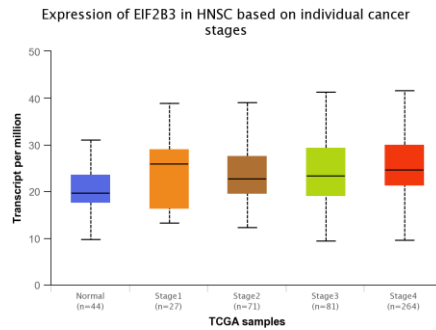

| Comparison       | Statistical significance |
|------------------|--------------------------|
| Normal-vs-Stage1 | 4.20E-02                 |
| Normal-vs-Stage2 | 1.80E-03                 |
| Normal-vs-Stage3 | 2.04E-03                 |
| Normal-vs-Stage4 | 7.50E-08                 |
| Stage1-vs-Stage2 | 6.33E-01                 |
| Stage1-vs-Stage3 | 7.36E-01                 |
| Stage1-vs-Stage4 | 1.27E-01                 |
| Stage2-vs-Stage3 | 8.26E-01                 |
| Stage2-vs-Stage4 | 1.19E-01                 |
| Stage3-vs-Stage4 | 5.49E-02                 |

**(B)**

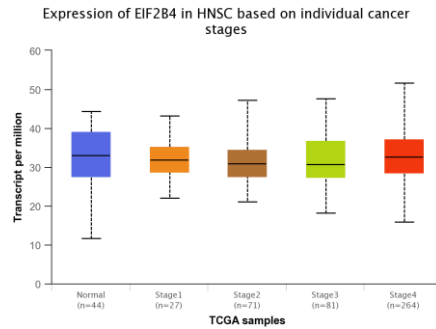

| Comparison       | Statistical significance |
|------------------|--------------------------|
| Normal-vs-Stage1 | 5.75E-01                 |
| Normal-vs-Stage2 | 8.41E-01                 |
| Normal-vs-Stage3 | 7.65E-01                 |
| Normal-vs-Stage4 | 3.59E-01                 |
| Stage1-vs-Stage2 | 7.10E-01                 |
| Stage1-vs-Stage3 | 7.38E-01                 |
| Stage1-vs-Stage4 | 9.09E-01                 |
| Stage2-vs-Stage3 | 9.29E-01                 |
| Stage2-vs-Stage4 | 4.14E-01                 |
| Stage3-vs-Stage4 | 4.48E-01                 |

**(C)**

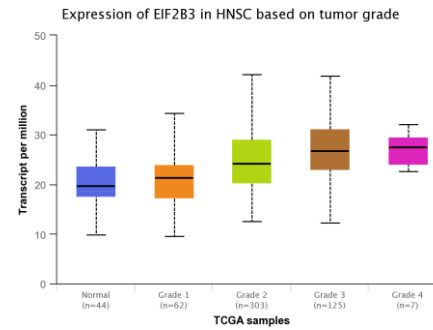

| Comparison         | Statistical significance |
|--------------------|--------------------------|
| Normal-vs-Grade 1  | 1.35E-01                 |
| Normal-vs-Grade 2  | 2.10E-06                 |
| Normal-vs-Grade 3  | 3.82E-09                 |
| Normal-vs-Grade 4  | 3.98E-04                 |
| Grade 1-vs-Grade 2 | 1.05E-02                 |
| Grade 1-vs-Grade 3 | 4.20E-05                 |
| Grade 1-vs-Grade 4 | 1.53E-02                 |
| Grade 2-vs-Grade 3 | 1.42E-02                 |
| Grade 2-vs-Grade 4 | 1.78E-01                 |
| Grade 3-vs-Grade 4 | 4.98E-01                 |

**(D)**

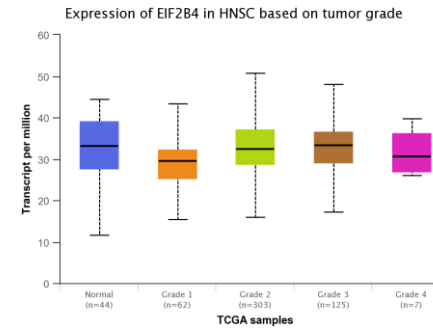

| Comparison         | Statistical significance |
|--------------------|--------------------------|
| Normal-vs-Grade 1  | 6.01E-01                 |
| Normal-vs-Grade 2  | 3.15E-01                 |
| Normal-vs-Grade 3  | 4.07E-01                 |
| Normal-vs-Grade 4  | 7.40E-01                 |
| Grade 1-vs-Grade 2 | 6.22E-02                 |
| Grade 1-vs-Grade 3 | 1.22E-01                 |
| Grade 1-vs-Grade 4 | 9.85E-01                 |
| Grade 2-vs-Grade 3 | 7.77E-01                 |
| Grade 2-vs-Grade 4 | 4.74E-01                 |
| Grade 3-vs-Grade 4 | 4.89E-01                 |

**Supplementary Figure 2.3.** *EIF2B5* gene is overexpressed in head and neck squamous cell carcinoma (HNSCC). **(A)** *EIF2B5* transcript expression is elevated in HNSCC at stages 2, 3 and 4, the increase becomes more pronounced with cancer progression. **(B)** *EIF2B5* is elevated in HNSCC across all histological grades, the median number of transcripts increases gradually from Grade 1 to 4. In all box-and-whisker diagrams horizontal line within the box corresponds to median, box boundaries to lower and upper quartiles and continuous lines stretch from minimum to maximum values. Statistical analysis was performed by comparing the interquartile range of each group by Welch's t-test, significance level  $p < 0.05$ .

**(A)**

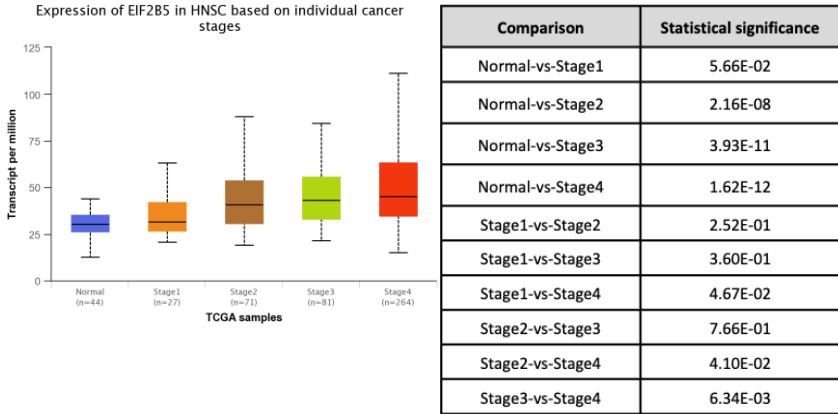

**(B)**

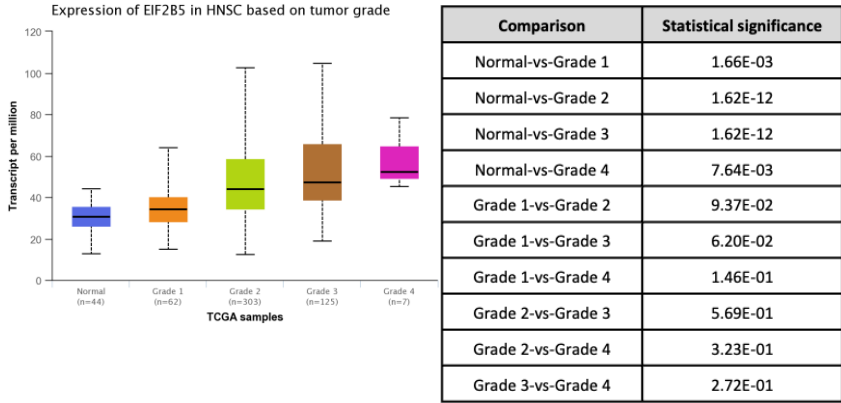

**Supplementary Figure 3.** *EIF2S1* promoter methylation levels are decreased in head and neck carcinoma (HNSCC). Beta values indicate the degree of promoter methylation ranging from 0 – unmethylated to 1- methylated. Beta values are obtained by dividing the methylated probe intensity by the total probe intensity (methylated and unmethylated). **(A)** Stage 2, 3 and 4 HNSCC show a lower degree of *EIF2S1* promoter methylation than normal samples. **(B)** Tumors with mutated *P53* have lower promoter methylation than non-mutant and normal samples. Statistical significance was determined with student t-test, significance level  $p < 0.05$ .

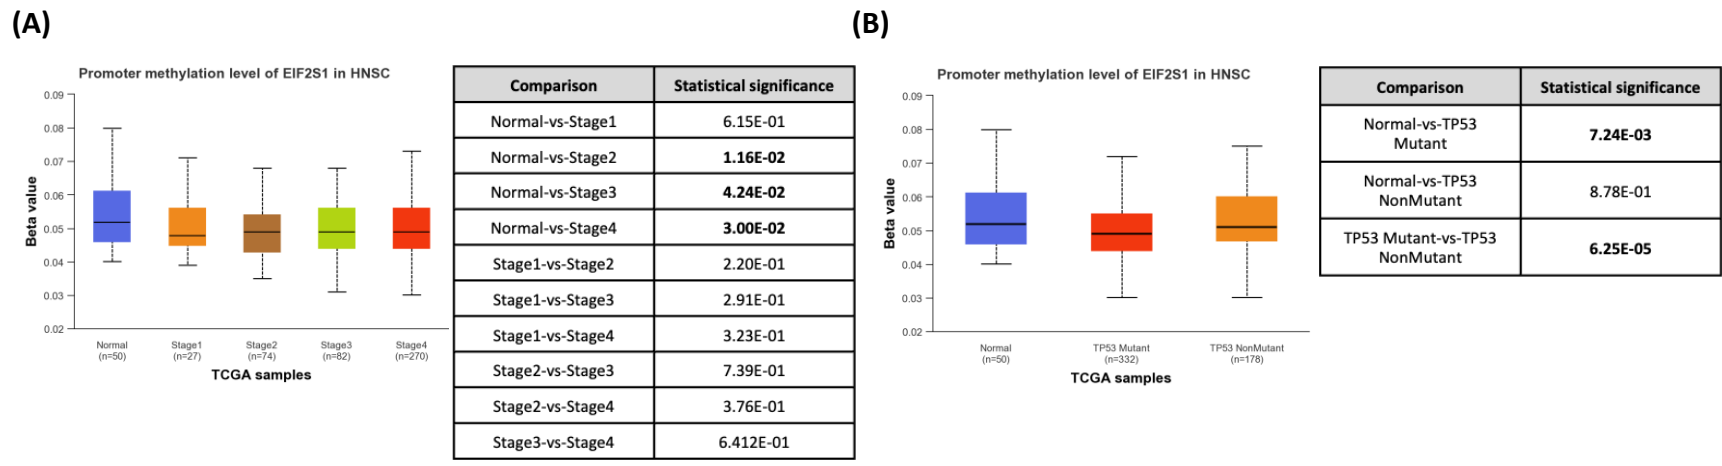

**Supplementary Figure 4.1.** EIF2 $\alpha$  and EIF2 $\beta$  (encoded by *EIF2S1* and *EIF2S2*) are overexpressed in HNSCC. **(A, B)** EIF2 $\alpha$  and EIF2 $\beta$  are elevated in HNSCC, the overexpression becomes more pronounced with cancer stage. **(C, D)** EIF2 $\alpha$  and EIF2 $\beta$  expression is elevated on all histological grades and highest in grade 2 HNSCC. In all box-and-whisker diagrams horizontal line within the box corresponds to median, box boundaries to lower and upper quartiles and vertical continuous lines stretch from minimum to maximum values. Statistical analysis was performed by comparing the interquartile range of each group by Welch's t-test, significance level  $p < 0.05$ .

**(A)**

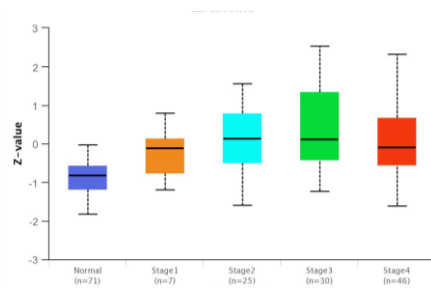

| Comparison       | Statistical significance |
|------------------|--------------------------|
| Normal-vs-Stage1 | 6.93E-02                 |
| Normal-vs-Stage2 | 8.85E-05                 |
| Normal-vs-Stage3 | 1.29E-06                 |
| Normal-vs-Stage4 | 9.25E-08                 |
| Stage1-vs-Stage2 | 3.05E-01                 |
| Stage1-vs-Stage3 | 5.02E-02                 |
| Stage1-vs-Stage4 | 3.45E-01                 |
| Stage2-vs-Stage3 | 2.06E-01                 |
| Stage2-vs-Stage4 | 8.14E-01                 |
| Stage3-vs-Stage4 | 9.63E-02                 |

**(B)**

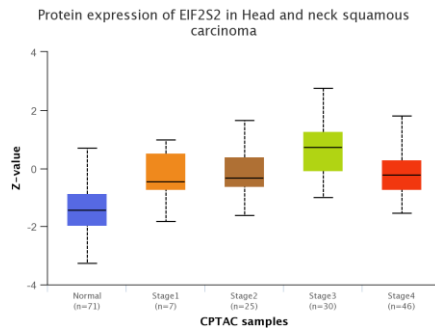

| Comparison       | Statistical significance |
|------------------|--------------------------|
| Normal-vs-Stage1 | 3.14E-02                 |
| Normal-vs-Stage2 | 1.12E-06                 |
| Normal-vs-Stage3 | 3.07E-12                 |
| Normal-vs-Stage4 | 4.03E-10                 |
| Stage1-vs-Stage2 | 6.34E-01                 |
| Stage1-vs-Stage3 | 5.85E-02                 |
| Stage1-vs-Stage4 | 5.64E-01                 |
| Stage2-vs-Stage3 | 1.13E-02                 |
| Stage2-vs-Stage4 | 8.83E-01                 |
| Stage3-vs-Stage4 | 6.99E-03                 |

**(C)**

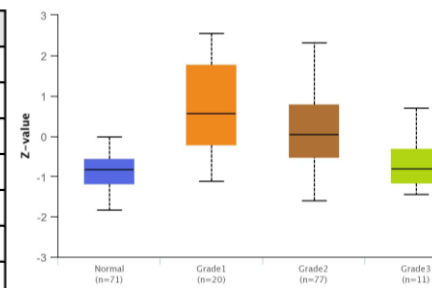

| Comparison       | Statistical significance |
|------------------|--------------------------|
| Normal-vs-Grade1 | 6.00E-06                 |
| Normal-vs-Grade2 | 3.66E-13                 |
| Normal-vs-Grade3 | 5.06E-01                 |
| Grade1-vs-Grade2 | 8.67E-05                 |
| Grade1-vs-Grade3 | 1.81E-03                 |
| Grade2-vs-Grade3 | <1E-12                   |

**(D)**

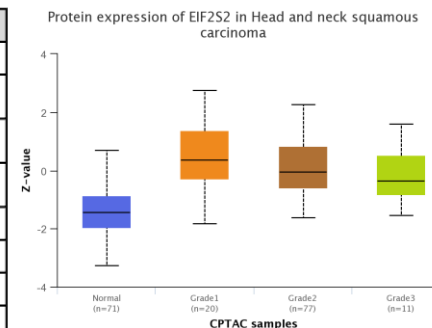

| Comparison       | Statistical significance |
|------------------|--------------------------|
| Normal-vs-Grade1 | 2.88E-06                 |
| Normal-vs-Grade2 | 3.96E-16                 |
| Normal-vs-Grade3 | 3.61E-03                 |
| Grade1-vs-Grade2 | 8.77E-02                 |
| Grade1-vs-Grade3 | 3.75E-01                 |
| Grade2-vs-Grade3 | <1E-12                   |



**Supplementary Figure 4.2.** *EIF2S3* gene product EIF2 $\gamma$  is overexpressed in head and neck squamous cell carcinoma (HNSCC). EIF2 $\gamma$  protein abundance is elevated in HNSCC of all stages, the increase becomes more pronounced with cancer progression. EIF2 $\gamma$  are elevated in HNSCC of all histological grades and highest in grade 1 tumors. In all box-and-whisker diagrams horizontal line within the box corresponds to median, box boundaries to lower and upper quartiles and vertical continuous lines stretch from minimum to maximum values. Statistical analysis was performed by comparing the interquartile range of each group by Welch's t-test, significance level  $p < 0.05$ .

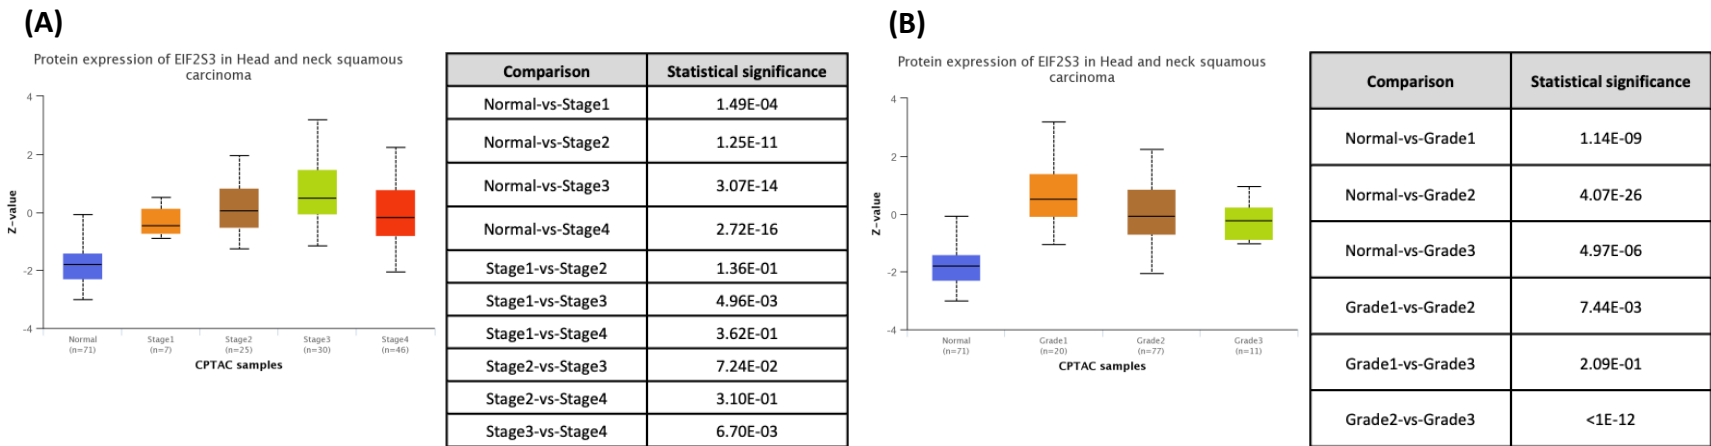

**Supplementary Figure 5.** Heatmap illustrating statistical significance levels of differences between the total immunostaining score (TIS) **(A)** and the intensity score (IS) **(B)** values between different types of histological lesions: metastasis (META); carcinoma (CA); carcinoma *in situ* (CIS); dysplasia (D) and non-neoplastic mucosa (NNPL). P-values were obtained by  $\chi^2$ -test.

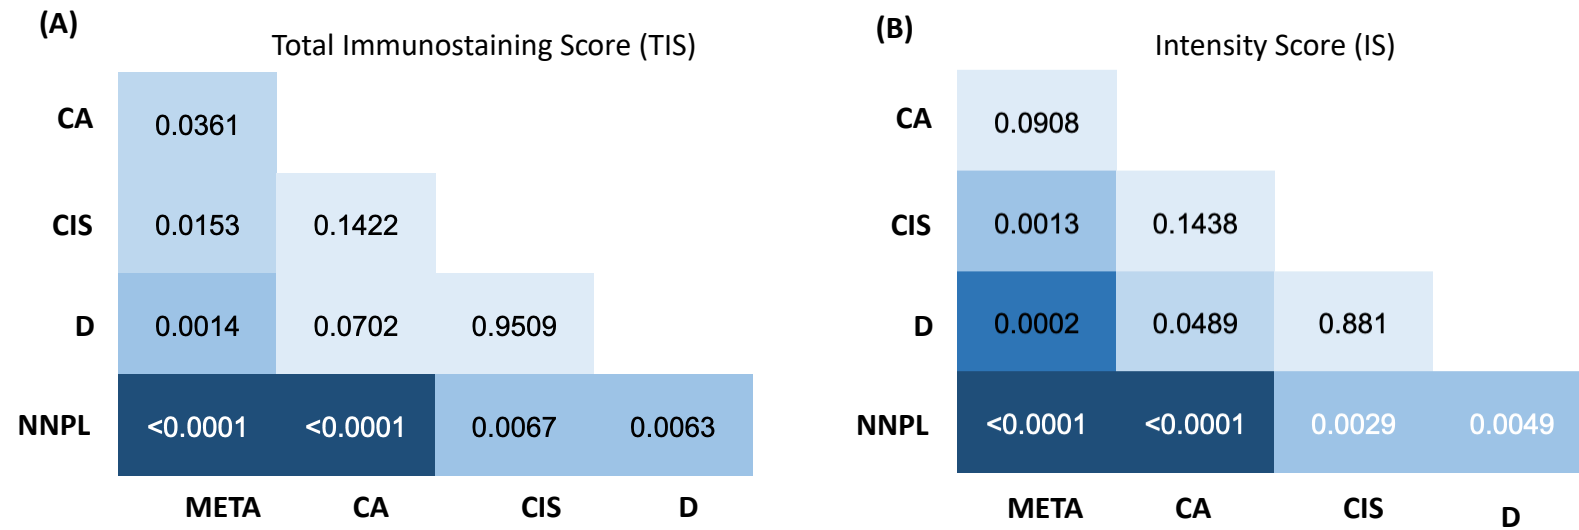

**Supplementary Figure 6.** Original, uncropped immunoblots from cryosamples. **(A)** Phospho-EIF2 $\alpha$  (36 kDa). **(B)** EIF2 $\alpha$  (36kDa). **(C)** GAPDH (36 kDa).

**(A)**

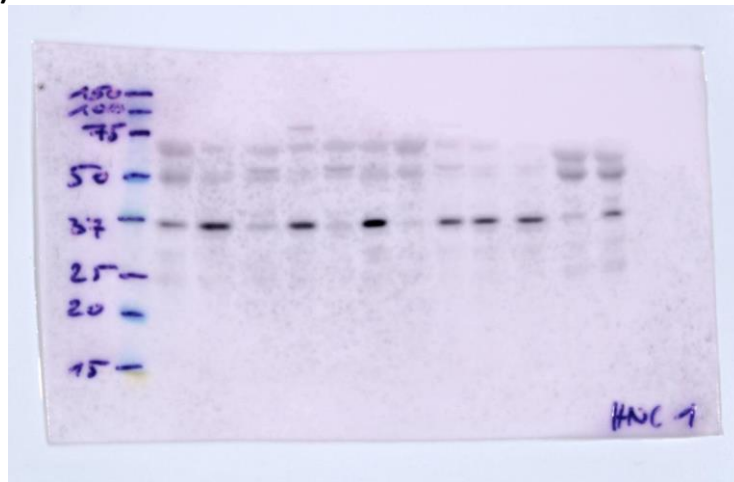

**(B)**

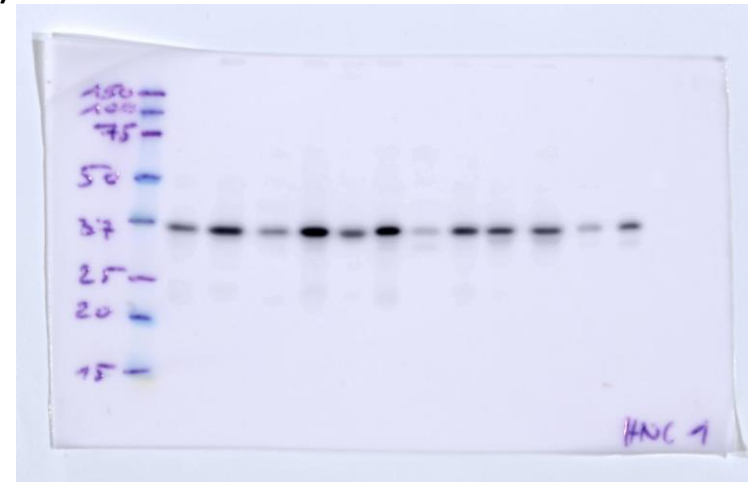

**(C)**

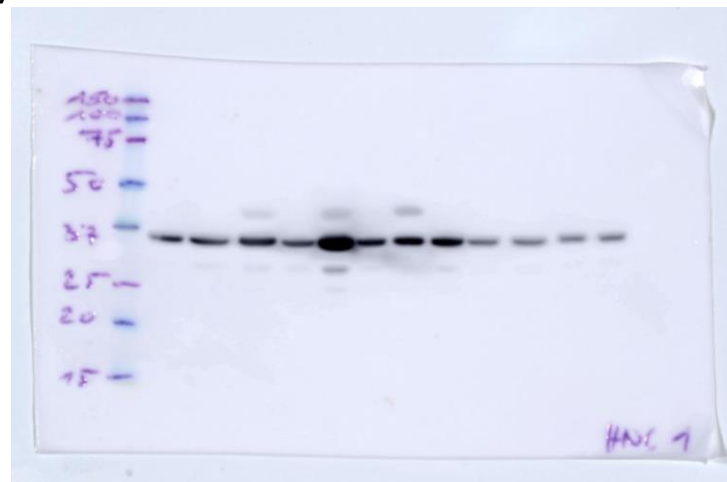

**Supplementary Figure 7. (A)** *EIF2S1* expression differs with HPV and *P53* mutation status in head and neck carcinoma (HNSCC). *EIF2S1* transcript expression is highest in HPV-negative tumors. In HPV+ positive HNSCC *EIF2S1* is also increased when compared to normal control. Statistical significance was determined with student t-test, significance level  $p < 0.05$ . Data source: TCGA (HNSCC  $n = 520$ ; normal control  $n = 44$ ), accessed via [ualcan.path.uab.edu](http://ualcan.path.uab.edu). **(B)** Immunohistochemistry of HNSCC tissue samples shows a trend for higher eIF2 $\alpha$  expression in HPV- and P16- negative HNSCC (p-value: ns;  $n = 83$ ).

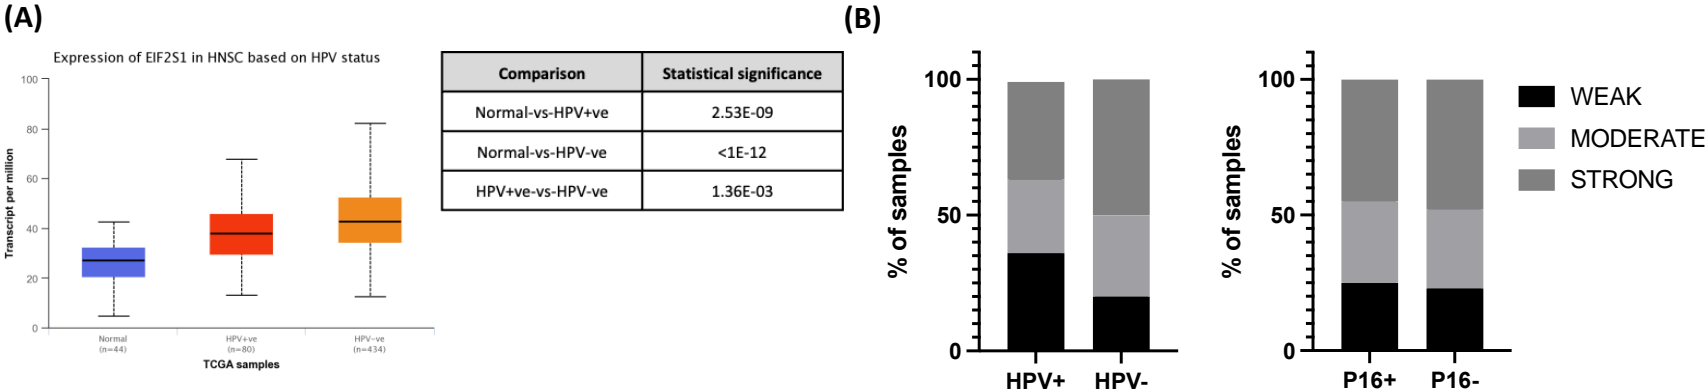

**Supplementary Figure 8.** Immunoblots and densitometric analysis of EIF2 $\alpha$  and phospho-EIF2 $\alpha$  abundance after 12h treatment with salubrinal (non-treated, 10, 20 and 50  $\mu$ M) in FaDu and SCC4 cells.

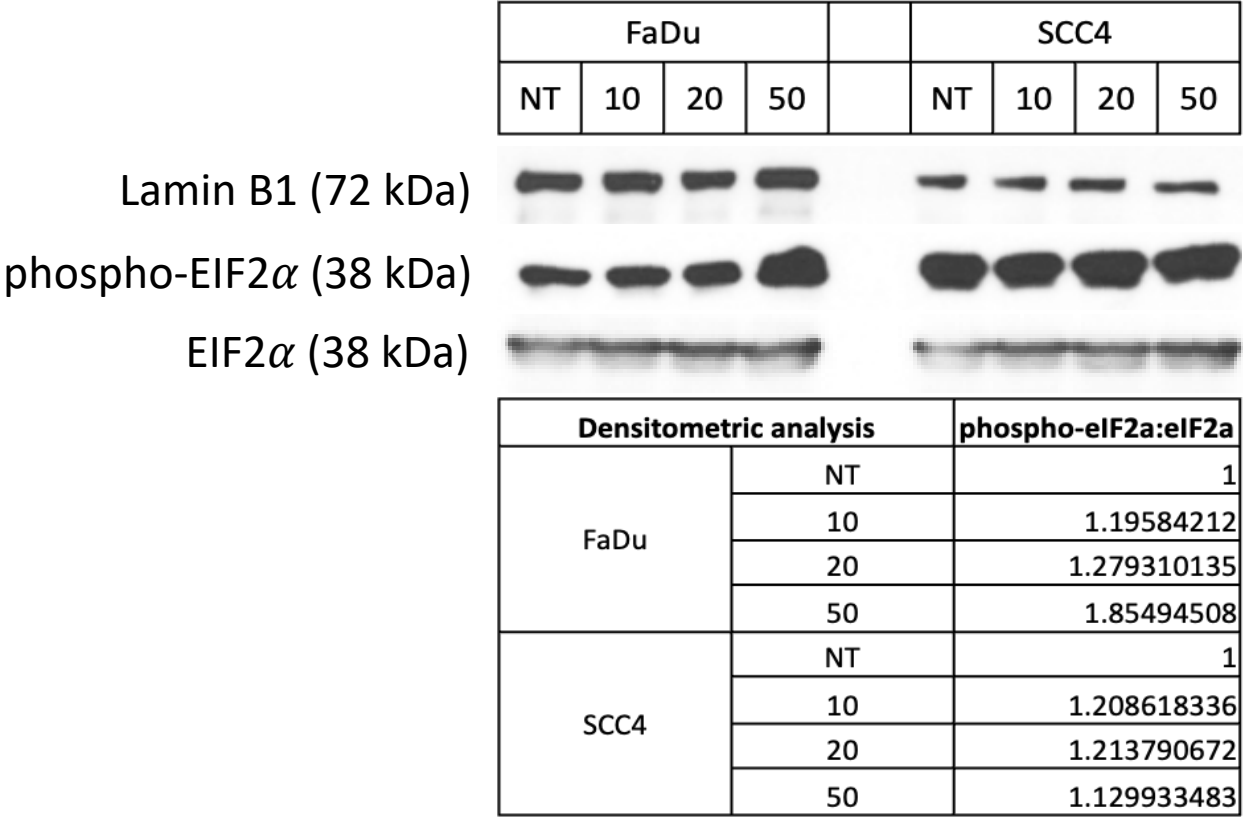

**Supplementary Figure 9.** The effects of gene ablation and dependency scores of eIF2 complex members, eIF2 kinases and selected phosphatases across 70 HNSCC cell lines. Publicly available data from CRISPR-Cas9 knockdown experiments provided by the DepMap Portal ([www.depmap.org](http://www.depmap.org)) were analyzed and are represented as two measures. **(A)** The Dependency Score depicts the degree to which a given gene is essential for cell survival and proliferation. A dependency score of 0 indicates that a gene is not essential; a score of 1 corresponds to the median of all pan-essential genes. EIF2 complex genes are common essential genes across HNSCC cell lines, in contrast, kinases (EIF2AK1-4) and phosphatases PPP1R15A (encoding GADD34) and PPP1R15B (encoding CREP) are not. **(B)** The CRISPR Gene Effect describes the perturbation effects of the ablation a given gene in cells. Scores close to 0 indicate non-essential genes, while negative scores indicate a higher likelihood that the gene of interest is essential.

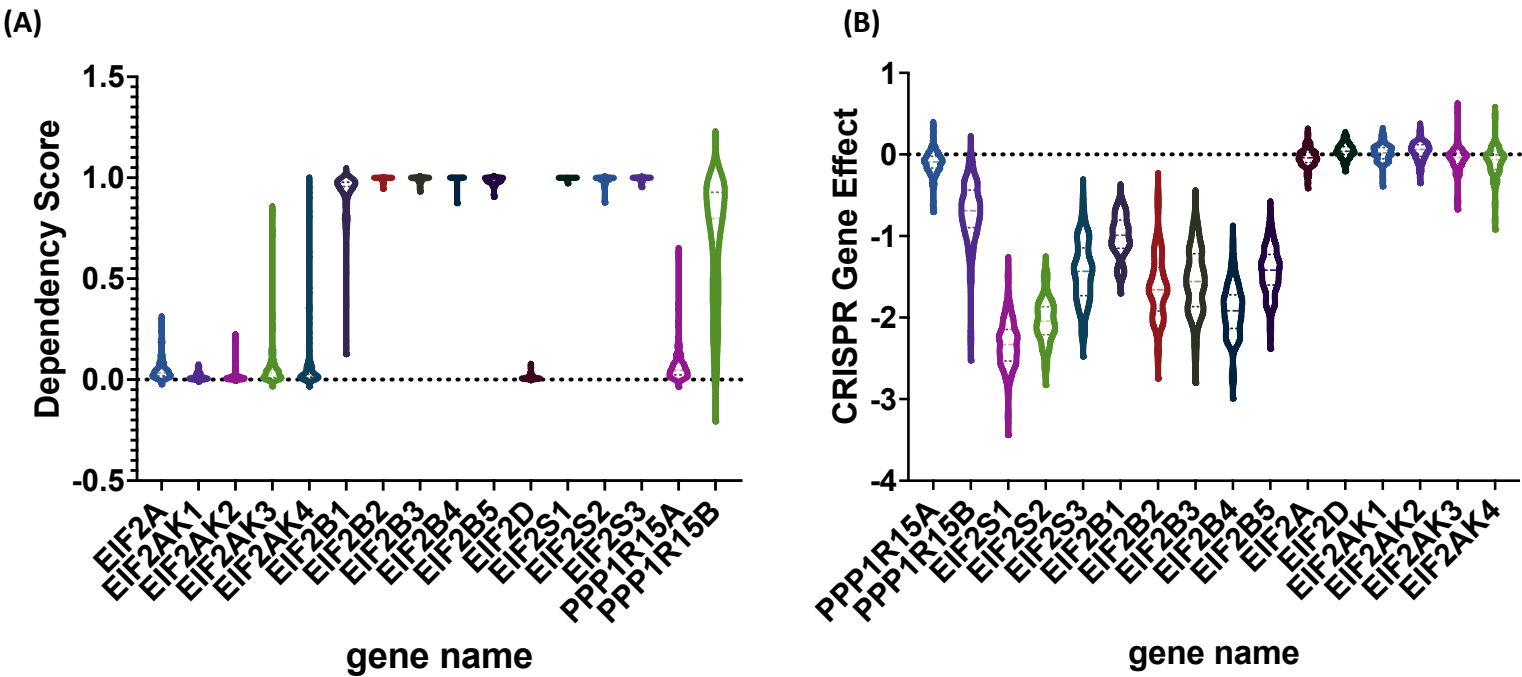

**Supplementary Material 10.** Original uncropped immunoblot images and densitometric analysis (continued on following pages).

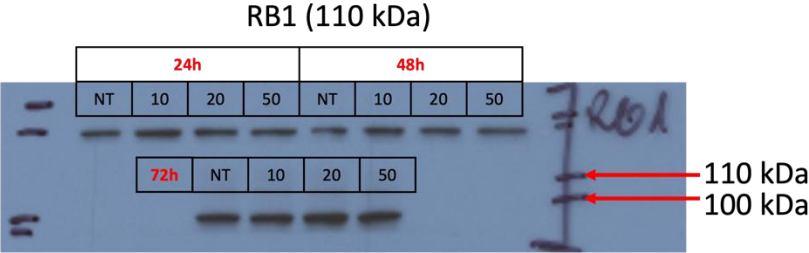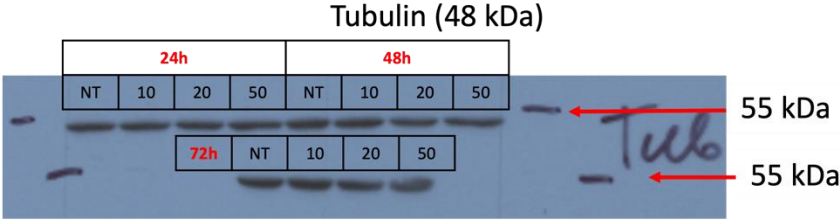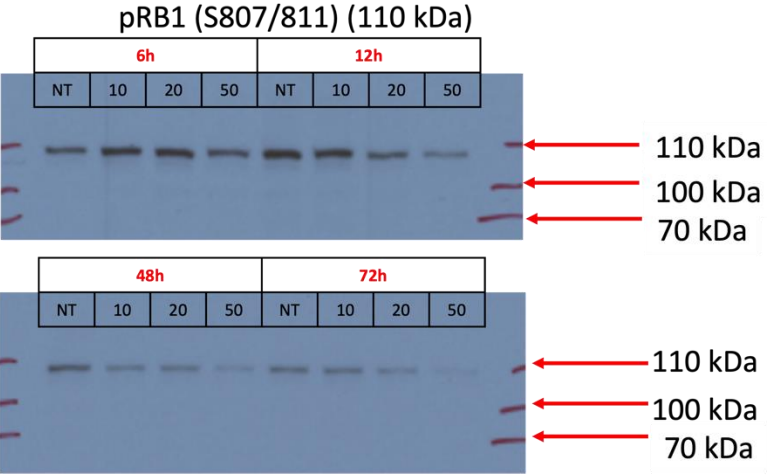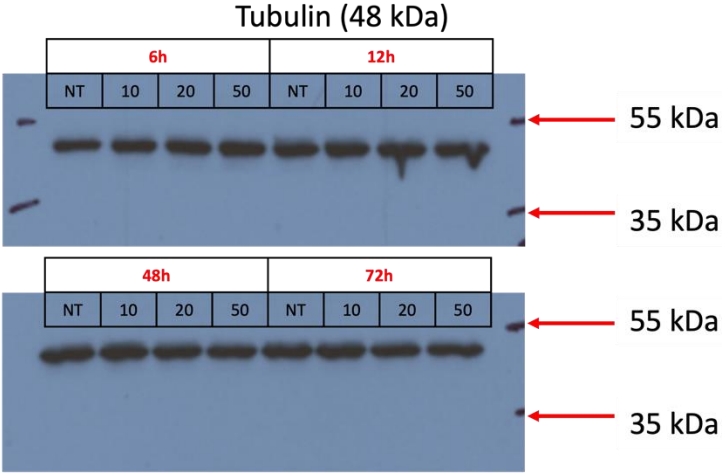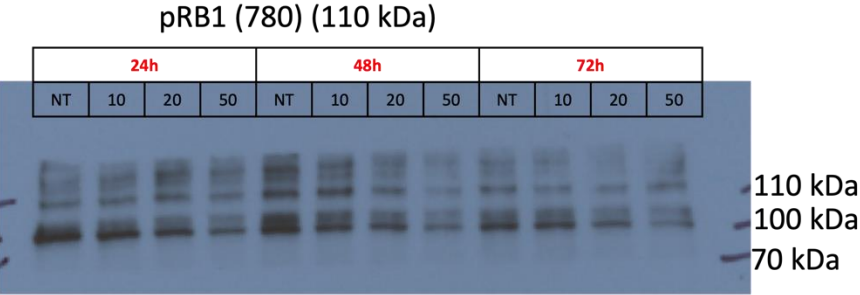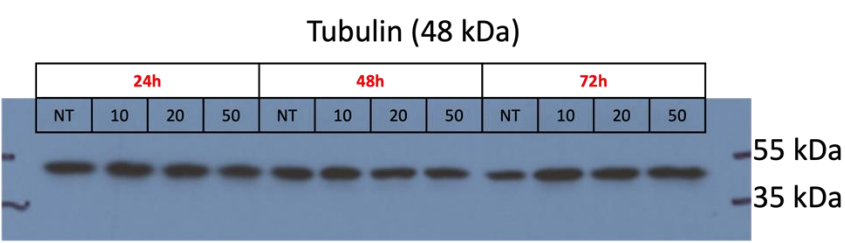

|     | RB1 |           |            | normalized - tubulin |
|-----|-----|-----------|------------|----------------------|
| 12h | NT  | 18281.915 | 1          | 1                    |
|     | 10  | 19026.329 | 1.0407186  | 1.00299327           |
|     | 20  | 24757.371 | 1.35420009 | 1.37787475           |
|     | 50  | 21346.886 | 1.16765043 | 1.02814504           |
| 24h | NT  | 8479.853  | 1          | 1                    |
|     | 10  | 15694.723 | 1.85082489 | 1.83542887           |
|     | 20  | 11909.581 | 1.40445607 | 1.96115398           |
|     | 50  | 11029.217 | 1.30063776 | 1.49700466           |
| 72h | NT  | 6853.903  | 1          | 1                    |
|     | 10  | 11660.995 | 1.70136563 | 1.47895513           |
|     | 20  | 9570.51   | 1.39635913 | 1.50575698           |
|     | 50  | 9757.752  | 1.42367816 | 1.75709369           |

|     | Tubulin for RB1 |           |            |
|-----|-----------------|-----------|------------|
| 12h | NT              | 6809.447  | 1          |
|     | 10              | 7065.569  | 1.03761275 |
|     | 20              | 6692.447  | 0.98281799 |
|     | 50              | 7733.397  | 1.1356865  |
| 24h | NT              | 8141.518  | 1          |
|     | 10              | 8209.811  | 1.00838824 |
|     | 20              | 5830.447  | 0.71613758 |
|     | 50              | 7073.569  | 0.8688268  |
| 72h | NT              | 8795.225  | 1          |
|     | 10              | 10117.882 | 1.15038353 |
|     | 20              | 8156.225  | 0.92734694 |
|     | 50              | 7126.296  | 0.81024601 |

|     | pRB1 (807/811) |           |            | normalized - tubulin |
|-----|----------------|-----------|------------|----------------------|
| 12h | NT             | 34838.413 | 1          | 1                    |
|     | 10             | 33657.927 | 0.96611539 | 0.99826244           |
|     | 20             | 24235.472 | 0.69565373 | 1.01330247           |
|     | 50             | 15140.945 | 0.4346049  | 0.99967121           |
| 24h | NT             | 19551.622 | 1          | 1                    |
|     | 10             | 11589.53  | 0.59276565 | 0.99711047           |
|     | 20             | 13077.187 | 0.66885433 | 1.00821872           |
|     | 50             | 6043.681  | 0.30911405 | 1.00796556           |
| 72h | NT             | 15260.551 | 1          | 1                    |
|     | 10             | 15936.915 | 1.04432107 | 1.04506873           |
|     | 20             | 9164.874  | 0.60055984 | 1.03780298           |
|     | 50             | 2561.347  | 0.16784106 | 1.02077908           |

|     | Tubulin for pRB1 (807/811) |            |            |
|-----|----------------------------|------------|------------|
| 12h | NT                         | 103930.806 | 1          |
|     | 10                         | 103750.22  | 0.99826244 |
|     | 20                         | 105313.342 | 1.01330247 |
|     | 50                         | 103896.635 | 0.99967121 |
| 24h | NT                         | 102700.978 | 1          |
|     | 10                         | 102404.22  | 0.99711047 |
|     | 20                         | 103545.049 | 1.00821872 |
|     | 50                         | 103519.049 | 1.00796556 |
| 72h | NT                         | 99531.463  | 1          |
|     | 10                         | 104017.22  | 1.04506873 |
|     | 20                         | 103294.049 | 1.03780298 |
|     | 50                         | 101599.635 | 1.02077908 |

|     | pRB1 (780) |           |            | normalized - tubulin |
|-----|------------|-----------|------------|----------------------|
| 12h | NT         | 15758.53  | 1          | 1                    |
|     | 10         | 12350.945 | 0.78376251 | 0.67465576           |
|     | 20         | 8991.631  | 0.57058818 | 0.53518512           |
|     | 50         | 5032.418  | 0.31934565 | 0.36845895           |
| 24h | NT         | 15285.702 | 1          | 1                    |
|     | 10         | 9944.924  | 0.65060303 | 0.64787285           |
|     | 20         | 7552.681  | 0.49410102 | 0.56869988           |
|     | 50         | 3655.175  | 0.23912379 | 0.2937009            |
| 72h | NT         | 9573.167  | 1          | 1                    |
|     | 10         | 9416.045  | 0.98358725 | 0.49775874           |
|     | 20         | 5188.66   | 0.54200036 | 0.30619843           |
|     | 50         | 3754.589  | 0.39219926 | 0.18715051           |

|     | Tubulin for pRB1 (780) |           |            |
|-----|------------------------|-----------|------------|
| 12h | NT                     | 9747.054  | 1          |
|     | 10                     | 11323.368 | 1.1617221  |
|     | 20                     | 10391.832 | 1.06615106 |
|     | 50                     | 8447.832  | 0.86670619 |
| 24h | NT                     | 8641.054  | 1          |
|     | 10                     | 8677.468  | 1.00421407 |
|     | 20                     | 7507.569  | 0.86882561 |
|     | 50                     | 7035.326  | 0.81417452 |
| 72h | NT                     | 5386.912  | 1          |
|     | 10                     | 10644.711 | 1.97603209 |
|     | 20                     | 9535.347  | 1.77009519 |
|     | 50                     | 11289.004 | 2.0956355  |



### Lamin B1 (72 kDa)

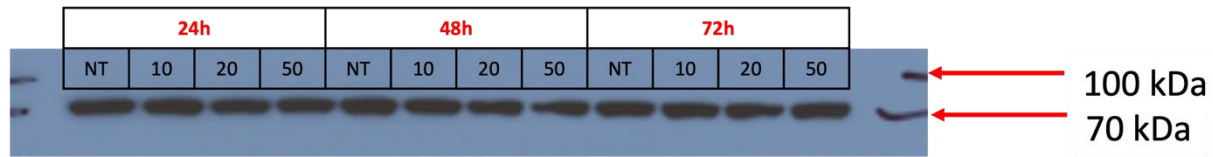

### Cyclin D1 (36 kDa)

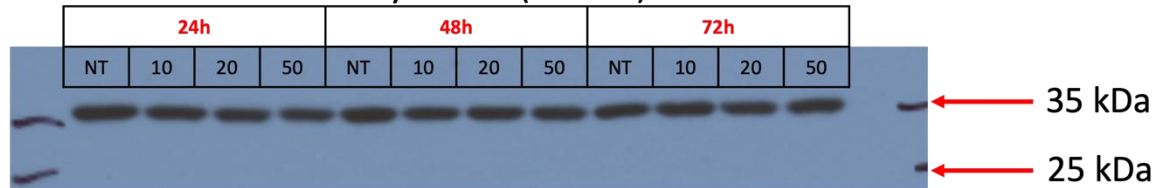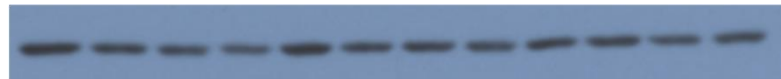

### Cyclin A (54 kDa)

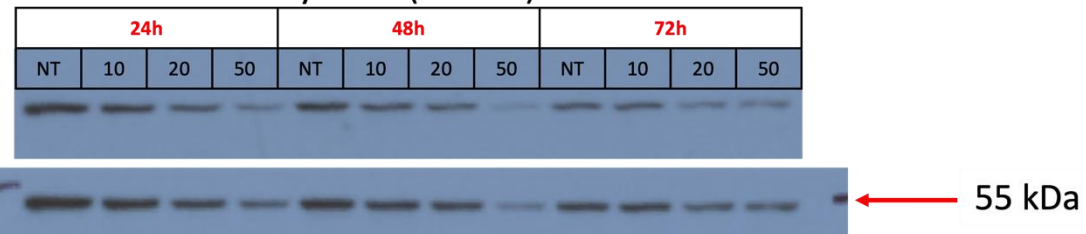

### Lamin B1 (72 kDa)

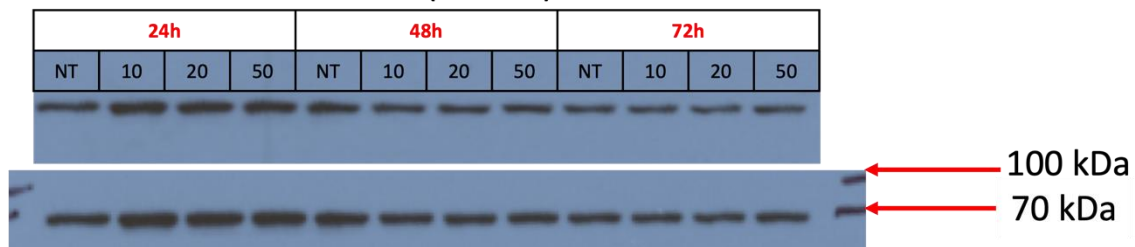

|     | Cyclin D1 |          |            | normalized to<br>lamin B1 |
|-----|-----------|----------|------------|---------------------------|
| 24h | NT        | 8661.933 | 1          | 1                         |
|     | 10        | 5658.154 | 0.65322071 | 0.549761595               |
|     | 20        | 4425.276 | 0.51088781 | 0.644875775               |
|     | 50        | 3251.619 | 0.37539184 | 0.485000026               |
| 48h | NT        | 7154.104 | 1          | 1                         |
|     | 10        | 4774.154 | 0.66733081 | 0.72426685                |
|     | 20        | 5348.447 | 0.74760543 | 1.311855507               |
|     | 50        | 4344.74  | 0.60730736 | 1.271753148               |
| 72h | NT        | 5258.447 | 1          | 1                         |
|     | 10        | 5499.861 | 1.04590975 | 1.159733272               |
|     | 20        | 3695.205 | 0.70271793 | 1.044944397               |
|     | 50        | 4638.154 | 0.88203875 | 0.860293397               |

|     | lamin B1 for cyclin D1 |           |            |
|-----|------------------------|-----------|------------|
| 24h | NT                     | 15280.217 | 1          |
|     | 10                     | 14976.439 | 0.98011952 |
|     | 20                     | 13354.024 | 0.87394204 |
|     | 50                     | 16032.501 | 1.04923255 |
| 48h | NT                     | 14352.823 | 1          |
|     | 10                     | 12973.51  | 0.90389953 |
|     | 20                     | 11880.024 | 0.82771341 |
|     | 50                     | 10805.368 | 0.75283921 |
| 72h | NT                     | 12452.246 | 1          |
|     | 10                     | 12690.731 | 1.01915197 |
|     | 20                     | 11657.489 | 0.93617561 |
|     | 50                     | 10829.167 | 0.86965572 |

|     | Cyclin A |          |            | normalized to<br>lamin B1 |
|-----|----------|----------|------------|---------------------------|
| 24h | NT       | 7878.033 | 1          | 1                         |
|     | 10       | 4616.548 | 0.58600262 | 0.38940132                |
|     | 20       | 2412.598 | 0.3062437  | 0.22409677                |
|     | 50       | 889.941  | 0.11296487 | 0.08743681                |
| 48h | NT       | 4734.083 | 1          | 1                         |
|     | 10       | 2723.598 | 0.57531691 | 0.81761253                |
|     | 20       | 1980.184 | 0.41828248 | 0.59591744                |
|     | 50       | 311.678  | 0.06583704 | 0.0942296                 |
| 72h | NT       | 2259.891 | 1          | 1                         |
|     | 10       | 2232.719 | 0.98797641 | 1.11925661                |
|     | 20       | 831.406  | 0.3678965  | 0.47447439                |
|     | 50       | 738.527  | 0.32679762 | 0.34071388                |

|     | lamin B1 for cyclin A |          |            |
|-----|-----------------------|----------|------------|
| 24h | NT                    | 6429.619 | 1          |
|     | 10                    | 9675.811 | 1.50488093 |
|     | 20                    | 8786.518 | 1.366569   |
|     | 50                    | 8306.811 | 1.29196007 |
| 48h | NT                    | 7129.447 | 1          |
|     | 10                    | 5016.669 | 0.70365472 |
|     | 20                    | 5004.255 | 0.70191349 |
|     | 50                    | 4981.255 | 0.69868743 |
| 72h | NT                    | 4039.719 | 1          |
|     | 10                    | 3565.891 | 0.88270768 |
|     | 20                    | 3132.305 | 0.77537695 |
|     | 50                    | 3874.719 | 0.95915557 |

### E2F1 (70 kDa)

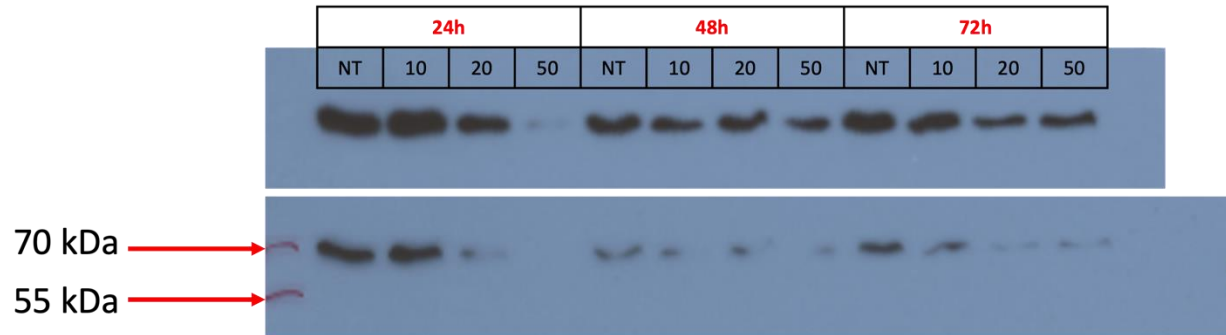

### P21 (21 kDa)

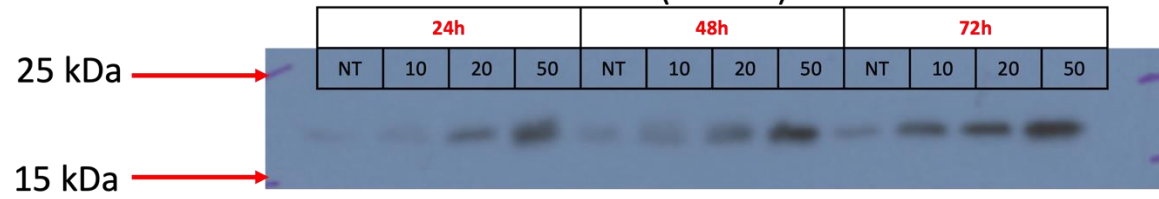

### CDK2 (33 kDa)

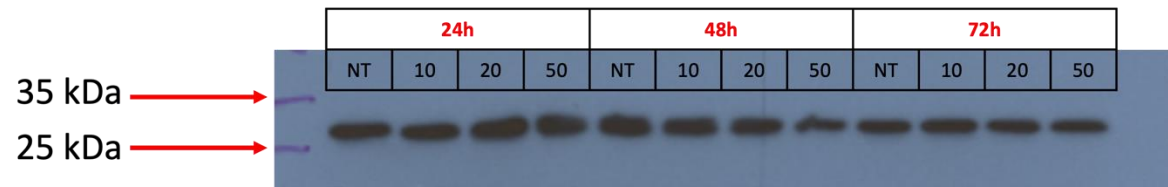

### Tubulin 48 kDa

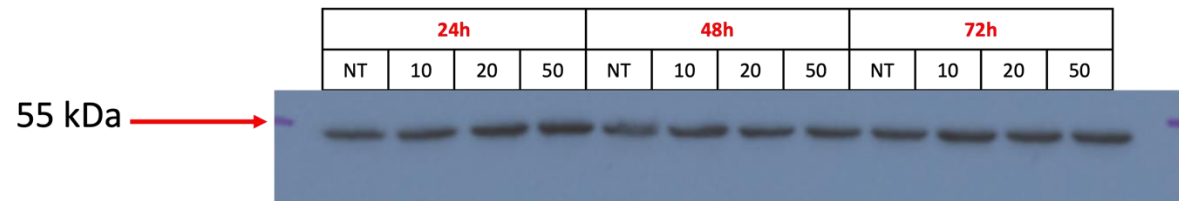

|     | P21 |           |            | normalized<br>to Tubulin |
|-----|-----|-----------|------------|--------------------------|
| 24h | NT  | 568.849   | 1          | 1                        |
|     | 10  | 875.678   | 1.53938567 | 1.53938567               |
|     | 20  | 39776.765 | 69.9249977 | 69.9249977               |
|     | 50  | 39800.869 | 69.967371  | 69.967371                |
| 48h | NT  | 1232.163  | 1          | 1                        |
|     | 10  | 39767.246 | 32.2743387 | 32.2743387               |
|     | 20  | 39788.735 | 32.2917788 | 32.2917788               |
|     | 50  | 39797.555 | 32.2989369 | 32.2989369               |
| 72h | NT  | 1537.548  | 1          | 1                        |
|     | 10  | 5317.539  | 3.45845398 | 3.45845398               |
|     | 20  | 7211.66   | 4.69036414 | 4.69036414               |
|     | 50  | 13522.631 | 8.79493258 | 8.79493258               |

|     | Tubulin for P21, E2F1, CDK2 |          |            |
|-----|-----------------------------|----------|------------|
| 24h | NT                          | 3298.326 | 1          |
|     | 10                          | 5074.347 | 1.53846133 |
|     | 20                          | 6508.882 | 1.97338953 |
|     | 50                          | 7618.468 | 2.30979836 |
| 48h | NT                          | 5834.832 | 1          |
|     | 10                          | 4410.468 | 0.75588603 |
|     | 20                          | 3277.861 | 0.5617747  |
|     | 50                          | 2976.447 | 0.510117   |
| 72h | NT                          | 3007.276 | 1          |
|     | 10                          | 4596.054 | 1.52831134 |
|     | 20                          | 4025.761 | 1.3386736  |
|     | 50                          | 4704.175 | 1.56426447 |

|     | E2F1 |           |            | normalized<br>to Tubulin |
|-----|------|-----------|------------|--------------------------|
| 24h | NT   | 19750.459 | 1          | 1                        |
|     | 10   | 20130.51  | 1.01924264 | 0.66250781               |
|     | 20   | 10673.539 | 0.54041979 | 0.27385358               |
|     | 50   | 156.192   | 0.00790827 | 0.00342379               |
| 48h | NT   | 10515.368 | 1          | 1                        |
|     | 10   | 6797.811  | 0.64646439 | 0.85524056               |
|     | 20   | 8488.368  | 0.80723452 | 1.4369364                |
|     | 50   | 5014.569  | 0.47688003 | 0.93484442               |
| 72h | NT   | 13229.61  | 1          | 1                        |
|     | 10   | 10446.489 | 0.7896294  | 0.51666789               |
|     | 20   | 5531.276  | 0.41809819 | 0.31232273               |
|     | 50   | 7584.882  | 0.5733262  | 0.36651488               |

|     | CDK2 |           |            | normalized<br>to Tubulin |
|-----|------|-----------|------------|--------------------------|
| 24h | NT   | 14661.338 | 1          | 1                        |
|     | 10   | 13936.681 | 0.95057361 | 0.61787293               |
|     | 20   | 16696.752 | 1.13882867 | 0.57709269               |
|     | 50   | 14046.095 | 0.95803637 | 0.41477056               |
| 48h | NT   | 14663.146 | 1          | 1                        |
|     | 10   | 13404.024 | 0.91413016 | 1.20934919               |
|     | 20   | 11846.489 | 0.80790909 | 1.4381372                |
|     | 50   | 8214.125  | 0.56018845 | 1.09815679               |
| 72h | NT   | 10730.075 | 1          | 1                        |
|     | 10   | 11830.782 | 1.10258148 | 0.72143774               |
|     | 20   | 10068.832 | 0.9383748  | 0.70097356               |
|     | 50   | 9654.589  | 0.89976901 | 0.57520261               |

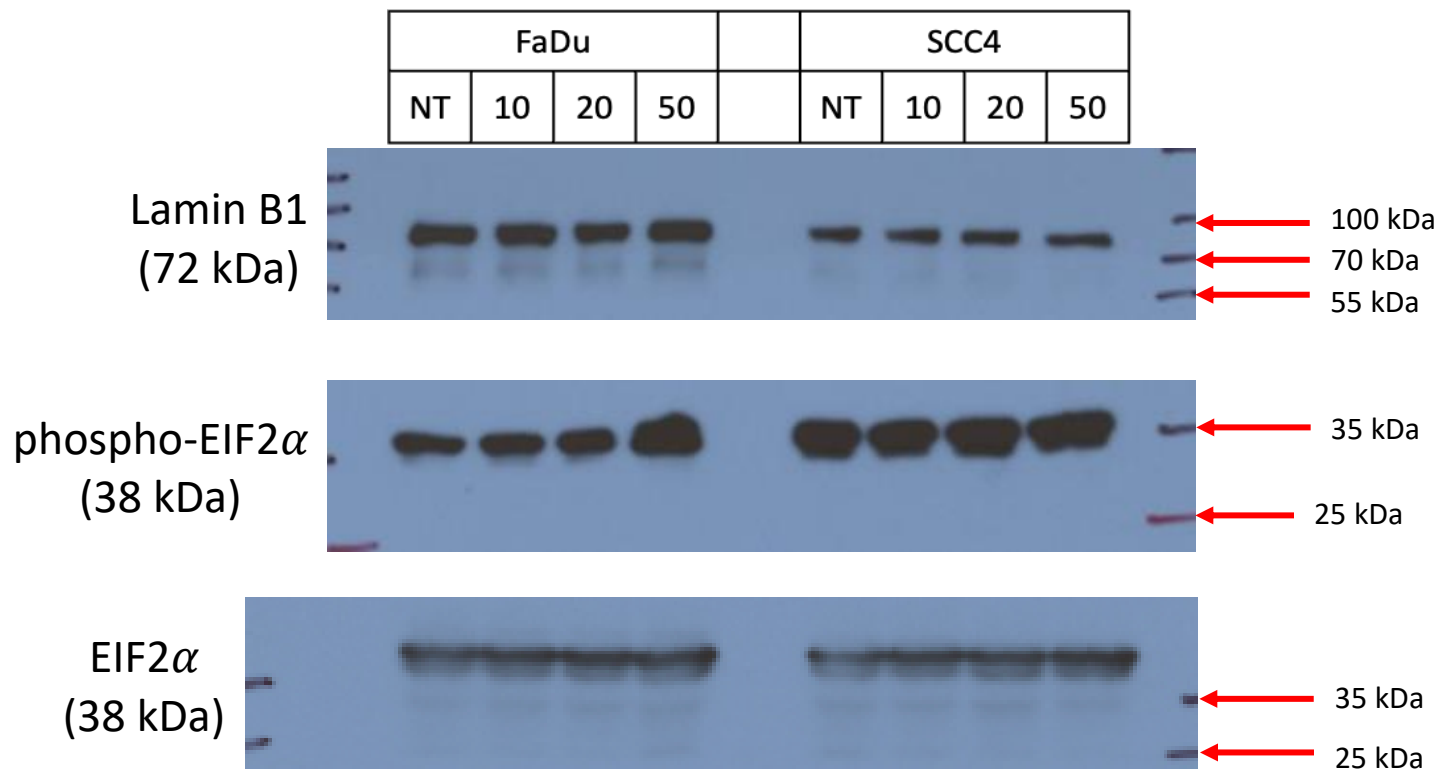

| 12h  |    | Lamin B1 |            |
|------|----|----------|------------|
|      |    |          | normalized |
| FaDu | NT | 4386.527 | 1          |
|      | 10 | 4093.648 | 0.93323214 |
|      | 20 | 3269.87  | 0.74543483 |
|      | 50 | 4419.406 | 1.00749545 |
| SCC4 | NT | 3357.577 | 1          |
|      | 10 | 3429.698 | 1.02148007 |
|      | 20 | 3771.456 | 1.12326717 |
|      | 50 | 3665.456 | 1.09169678 |

| 12h  |    | p- eIF2a  |            |                  |
|------|----|-----------|------------|------------------|
|      |    |           | normalized | norm to Lamin B1 |
| FaDu | NT | 5042.355  | 1          | 1                |
|      | 10 | 5188.598  | 1.02900292 | 1.102622667      |
|      | 20 | 5502.426  | 1.09124129 | 1.463898994      |
|      | 50 | 9134.447  | 1.81154381 | 1.798066492      |
| SCC4 | NT | 8344.083  | 1          | 1                |
|      | 10 | 8448.912  | 1.01256327 | 0.991270706      |
|      | 20 | 9450.447  | 1.13259264 | 1.008302099      |
|      | 50 | 10076.912 | 1.20767159 | 1.106233538      |

| 12h  |    | eIF2a    |            |                  |
|------|----|----------|------------|------------------|
|      |    |          | normalized | norm to Lamin B1 |
| FaDu | NT | 6696.669 | 1          | 1                |
|      | 10 | 5762.376 | 0.86048392 | 0.922047023      |
|      | 20 | 5712.205 | 0.85299199 | 1.144287811      |
|      | 50 | 6539.983 | 0.9766024  | 0.969336781      |
| SCC4 | NT | 6874.811 | 1          | 1                |
|      | 10 | 5759.619 | 0.8377858  | 0.820168515      |
|      | 20 | 6414.912 | 0.93310376 | 0.830705098      |
|      | 50 | 7347.79  | 1.06879884 | 0.979025363      |
